1 Temporal dynamics of *Candida albicans* morphogenesis and gene expression reveals  
2 distinctions between in vitro and in vivo filamentation.

3

4 Running title: *C. albicans* filamentation in vitro and in vivo

5

6 Rohan S. Wakade<sup>1</sup>, Melanie Wellington<sup>1</sup>, and Damian J. Krysan<sup>1,2\*</sup>

7

8 Department of Pediatrics, Carver College of Medicine, University of Iowa, Iowa City IA<sup>1</sup>; and

9 Department of Molecular Physiology and Biophysics, Carver College of Medicine, University of

10 Iowa, Iowa City IA<sup>2</sup>

11

12

13 Corresponding Author:

14 \*Damian J. Krysan

15 2040 Med Labs 25 S. Grand Avenue, Department of Pediatrics and Microbiology/Immunology,

16 Carver College of Medicine, University of Iowa, Iowa City Iowa 52242, Phone: 319-335-3066,

17 [damian-krysan@uiowa.edu](mailto:damian-krysan@uiowa.edu)

18

19

20

21

22

23

24 **Abstract**

25 *Candida albicans* is a common human fungal pathogen that is also a commensal of the oral  
26 cavity and gastrointestinal tract. *C. albicans* pathogenesis is linked to its transition from budding  
27 yeast to filamentous morphologies including hyphae and pseudohyphae. The centrality of this  
28 virulence trait to *C. albicans* pathobiology has resulted in extensive characterization a wide  
29 range factors associated with filamentation with a strong focus on transcriptional regulation. The  
30 vast majority of these experiments have used in vitro conditions to induce the yeast-to-filament  
31 transition. Taking advantage of in vivo approaches to quantitatively characterize both  
32 morphology and gene expression during filamentation during mammalian infection, we have  
33 investigated the dynamics of these two aspects of filamentation in vivo and compared them to in  
34 vitro filament induction with “host-like” tissue culture media supplemented with serum at  
35 mammalian body temperature. Although filamentation shares many common features in the two  
36 conditions, we have found two significant differences. First, alternative carbon metabolism  
37 genes are expressed early during in vitro filamentation and late in vivo, suggesting significant  
38 differences in glucose availability. Second, *C. albicans* begins a hyphae-to-yeast transition after  
39 4hr incubation while we find little evidence of hyphae-to-yeast transition in vivo up to 24hr post  
40 infection. We show that the low rate of in vivo hyphae-to-yeast transition is likely due to very low  
41 expression of *PES1*, a key driver of lateral yeast in vitro, and that heterologous expression of  
42 *PES1* is sufficient to trigger lateral yeast formation in vivo.

43

44

45

46

47 **Importance**

48 *Candida albicans* filamentation is correlated with virulence and is an intensively studied aspect  
49 of *C. albicans* biology. The vast majority of studies on *C. albicans* filamentation are based on in  
50 vitro induction of hyphae and pseudohyphae. Here we used an in vivo filamentation assay and  
51 in vivo expression profiling to compare the tempo of morphogenesis and gene expression  
52 between in vitro and in vivo filamentation. Although the hyphal gene expression profile is  
53 induced rapidly in both conditions, it remains stably expressed over a 12hr time course in vivo  
54 while it peaks after 4hr in vitro and is reduced. This reduced hyphal gene expression in vitro  
55 correlates with reduced hyphae and increased hyphae-to-yeast transition. In contrast, there is  
56 little evidence of evidence of hyphae-to-yeast transition in vivo.

57

58

59

60

61

62

63

64

65

66

67

## 68 Introduction

69 *Candida albicans* is a component of the human mycobiome that also causes disease in  
70 both immunocompetent and immunocompromised patients (1, 2). The transition of *C. albicans*  
71 from harmless commensal to invasive pathogen is associated with a morphological switch from  
72 budding yeast to filaments comprised of both hyphae and pseudohyphae (3). In general, *C.*  
73 *albicans* strains and mutants that show low rates of filamentation are more fit in the commensal  
74 setting and less fit during invasive infection (4, 5). Over the years, filamentation has been one of  
75 the most intensively studied *C. albicans* virulence traits (3). The vast majority of these studies  
76 used one of a number of in vitro conditions to generate filaments. Recently, we developed an in  
77 vivo imaging approach for the analysis of *C. albicans* filamentation during infection. In this  
78 approach, *C. albicans* is inoculated directly into the subdermal ear tissue of the mouse (6).  
79 Anatomically, this compartment is stromal tissue beneath an epithelium, in this case skin  
80 epithelium, and shares many features with stromal tissue beneath colonized epithelium of the  
81 mouth and GI tract. We have used this approach to identify the transcription factor network that  
82 regulates filamentation in vivo (7) as well as to characterize the filamentation of clinical isolates  
83 and protein kinase mutants (8, 9). These studies have revealed a number of important  
84 differences in the genes required for filamentation in vivo compared to in vitro. For example, the  
85 cAMP-Protein Kinase A pathway is absolutely required for in vitro filamentation in all inducing-  
86 media but is dispensable for filamentation in vivo (9).

87 The first goal of this work was to characterize the temporal dynamics of filamentous  
88 morphogenesis and associated gene expression in vivo beginning at early time points using the  
89 imaging assay. We coupled this with in vivo expression analysis using Nanostring nCounter  
90 technology to profile the expression of a set of 186 environmentally responsive genes over the  
91 same time periods (7, 9). This set of genes includes 57 (30%) hyphae-associated genes (7).  
92 Our previous Nanostring-based in vivo expression profiling of *C. albicans* infection of ear tissue,

93 kidney tissue and oral tissue at single time points has shown both similarities and differences  
94 within these niches (9). Furthermore, expression profiles of in vitro hyphal induction also show  
95 similarities and differences to in vivo expression.

96 To further explore the similarities and differences between filamentation under in vivo  
97 and in vitro conditions, we followed morphogenesis and gene expression over an identical 12hr  
98 time course of in vitro and in vivo filamentation. Nanostring nCounter technology was used to  
99 analyze gene expression for two primary reasons. First, genome-wide RNA-seq methods for the  
100 direct analysis of *C. albicans* gene expression in infected tissue have not been developed.  
101 Although a gene-enrichment strategy has been reported (10), its application to time course  
102 analysis was cost prohibitive. Second, we were most interested in the temporal dynamics of a  
103 set of well-studied hyphae-associated environmentally responsive genes; therefore, genome-  
104 wide characterization of expression was not necessary for our purposes (11). As such, this  
105 approach limits the conclusions we can make about global patterns of gene expression.

106 A single in vitro filament-inducing condition was used and was chosen because it is  
107 generally used in the field to approximate a host-like environment. Specifically, the tissue  
108 culture medium RPMI 1640 supplemented with 10% bovine calf serum (BCS) was used and  
109 incubations were performed at mammalian body temperature (37°C). Previous microarray-  
110 based expression profiling of the time course for in vitro *C. albicans* filamentation used rich  
111 medium (YPD or YEPD) supplemented with 10% BCS (12). It has become well-established that  
112 the specific filament-inducing medium has a significant effect on both the regulatory pathways  
113 and gene expression patterns involved in *C. albicans* filamentation (13). Indeed, those  
114 considerations motivated our study of gene expression pattern in vivo.

115 To date, we have performed hundreds of in vivo imaging assays with WT cells, the  
116 majority of which examined filamentation at 24hr. In vitro, hypha begin to form lateral yeast cells

117 after ~4hr of induction; however, we have rarely observed lateral yeast cell formation in vivo.  
118 Therefore, the second goal of this study was to explore the mechanistic basis underlying this  
119 distinction between in vitro and in vivo morphogenesis. As detailed below, our data suggest that  
120 *C. albicans* begin a hyphae-to-yeast transition that is correlated with a reduction in the  
121 expression of hyphae-associated genes after ~4hr induction (14) and that this is likely to involve  
122 *PES1*, a gene known to drive lateral yeast formation in vitro (15). In vivo, *C. albicans* cells  
123 maintain expression of hyphae-associated genes and have very low expression of *PES1*  
124 throughout the time course, a result that explains why we find little evidence of the hyphae-to-  
125 yeast transition in vivo. Consistent with this model, we show that expression of *PES1* from a  
126 strong, heterologous promoter is sufficient to drive lateral yeast formation in vivo.

## 127 **Results**

### 128 **In vivo filamentation is initiated rapidly and reaches steady state twelve hours after** 129 **infection.**

130 Stationary phase *C. albicans* SN250 labeled with NEON were injected into the  
131 subdermal tissue of mice ears and imaged at 1hr, 2hr, 4hr, 8hr and 12hr post infection (Fig. 1A).  
132 Germ tube-like cells with short filaments are initially observed in 60% of cells 1hr post-infection  
133 (Fig. 1B&C). The percentage of cells that have a filamentous morphology increase slightly until  
134 4hr at which a steady state ratio of filamentous cells to yeast cells was reached. Previously  
135 reported data at 24hr indicate that there is little change in this ratio between 12hr and 24hr. The  
136 length of the filaments increases over the first few hours of the time course (Fig. 1D) and  
137 reaches a steady state at 8hr. The median length remains constant between 8hr and 12hr and  
138 comparison to previously reported data for 24hr indicates that the median length of the  
139 population remains relatively stable to that time point.

140           The same time course experiment was conducted for in vitro filamentation by inoculating  
141 stationary phase cells into RPMI 1640 with 10% BCS at 37°C and fixing cells at each time point.  
142 As expected, germ tubes are also initially observed in vitro after 1hr (Fig. 2A&B) but the  
143 proportion of cells that have formed a germ tube is significantly less in vitro relative to in vivo  
144 conditions after 1hr (60% in vivo and 20% in vitro). The percentage of filamentous cells peaks at  
145 4hr. In contrast to in vivo conditions, the percentage of filamentous cells then declines by ~25%  
146 between 4hr and 12hr ( $p < 0.05$ ). Similar to in vivo filamentation, the median length of the  
147 filaments increases over the first 4h to a steady state (Fig. 2C). These data indicate that in vitro  
148 filamentation in RPMIS is slightly delayed relative to in vivo conditions and that the ratio of  
149 filaments to yeast begins to decline after a peak at 4hr.

#### 150 **Expression profiles of in vivo and in vitro filaments evolve over the time course.**

151           Nanostring nCounter methods were used to characterize the expression of 186 genes  
152 and compared them to the yeast inoculum at 1, 2, 4, 8, and 12hr post-infection (Table S1) as  
153 well as post filament induction in vitro (Table S2). The raw, normalized, and processed data are  
154 provided in Tables S1&S2 for each time point. Differentially expressed genes were defined as  
155 those with  $\pm 2$ -fold change in expression with an FDR  $< 0.1$  as determined by the Benjamini-  
156 Yeuketil procedure when compared to expression in the yeast phase inoculum which was grown  
157 overnight at 30°C in rich medium (yeast peptone with 2% dextrose, YPD). The time course of  
158 transcriptional changes is summarized by volcano plots in Fig. 3A and 3B for in vivo and in vitro  
159 conditions, respectively. The total number of differentially expressed genes at each time point is  
160 indicated in Fig. 3A and 3B. We generated Venn diagrams to compare the genes upregulated  
161 under in vitro conditions to in vivo at each time point as a way to assess the similarity and  
162 differences between the two conditions at the same time point (Fig. 4A-E). At 1hr, the set of  
163 genes induced by a statistically significant amount is low because of relatively high variability  
164 (Table S1); this variability resolves by 2hr. As expected, the set of upregulated genes common

165 to both in vivo and in vitro conditions at 1hr includes regulators of hyphae morphogenesis  
166 (*BRG1*, *CPH1/2*, *TEC1*, & *UME6*) as well as hyphae-associated cell wall genes (*ALS1* &  
167 *HWP1*); see Table S1 graphs below (Fig. 5&6).

168 At early time points (Fig. 4A-C), the majority of genes upregulated in vivo are also  
169 upregulated in vitro. However, a large proportion of genes are uniquely upregulated in vitro. For  
170 example, one-third of the genes upregulated in vitro at 2hr were not upregulated in vivo. The set  
171 uniquely upregulated in vitro is enriched for carbon metabolism genes (FDR 0.01, Benjamini-  
172 Yeukiel: *PCK1*, *GPD2*, *GAL1*, *ACS1*, *FBP1*, Fig. 4F); *PCK1* and *FBP1* are involved in  
173 gluconeogenesis and *ACS1* is induced by low glucose (16), suggesting that glucose availability  
174 may be distinct between in vitro and in vivo conditions at early time points. Further supporting  
175 that possibility, *AOX2*, which is induced by low glucose conditions (17), was strongly  
176 upregulated at the 1hr (59-fold increase relative to yeast, FDR = 0.005) and 2hr (22- fold-  
177 increase relative to yeast, FDR = 0.006) time points in vitro, while *AOX2* expression is below the  
178 level of detection in vivo (Table S1). At later time points in vivo, *AOX2* (12 hr, 69-fold increase  
179 relative to yeast, FDR = 0.02) and *PCK1* were upregulated (12hr, 4-fold increase relative to  
180 yeast, FDR = 0.05), suggesting that the cells begin to depend more on non-glucose carbon  
181 sources as the time course progresses.

182 At the 12hr time point, more genes are uniquely upregulated in vivo compared to in vitro  
183 (Fig. 4E). The set of 24 genes upregulated only in vivo at the 12hr time point is enriched for zinc  
184 (FDR:  $2e^{-4}$ ; *ZAP1*, *ZRT1* and *PRA1*) and iron (FDR:  $2e^{-3}$ ; *HAP3*, *FTR1*, *RBT5*, and *PGA7*)  
185 homeostasis (18, 19). Interestingly, filamentous growth associated genes are also enriched in  
186 this set (FDR:  $3e^{-4}$ ) including transcriptional regulators of filamentous growth *UME6*, *AHR1*, and  
187 *CPH2* and the hyphae-associated cell wall gene *ALS3* (Fig. 4G). We were particularly struck by  
188 the fact that *UME6* expression was no longer upregulated after 12hr of induction in vitro. Indeed,  
189 *UME6* expression had returned to the near background levels of expression by 8hr of in vitro



190 induction and was not different than in yeast phase (Fig. 5A). *UME6* expression is required for  
191 the maintenance of hyphal elongation both in vitro and in vivo (7, 20). The decline in the  
192 expression of *UME6* after 8hr of in vitro hyphal induction suggests that the hyphal transcriptional  
193 program is reduced late in the time course whereas in vivo the activity of this program appears  
194 to be maintained longer.

195 **The expression of hyphae-induced genes decreases over time in vitro and correlates**  
196 **with reduced filaments at those time points.**

197 To further evaluate the possibility that the hyphal morphogenic and transcriptional  
198 program was waning after 4hr in vitro but not in vivo, we compared the expression of  
199 transcription factors that positively regulate filamentation in vitro and in vivo. In addition to  
200 *UME6*, the hyphae-induced transcription factors (TFs) *BRG1* and *TEC1* are upregulated after  
201 1hr exposure to RPMIS and 1hr post-infection in vivo (Fig. 5A-C). In vitro, the expression of all  
202 three TFs peaks and then falls. In contrast, in vivo expression of *UME6*, *BRG1*, and *TEC1*  
203 shows a slower slope of initial induction and then maintains relatively stable levels throughout  
204 the time course. The hyphae-associated TFs *CPH1* and *CPH2* also follow the same pattern of  
205 expression but are not as strongly induced (Tables S1 and S2). *EFG1* is a critical regulator of  
206 the hyphal transcriptional profile under many conditions (21). Interestingly, and in contrast to the  
207 other three TFs, *EFG1* expression is reduced relative to yeast phase both in vitro and in vivo  
208 (Fig. 5D). Finally, expression of the repressor of filamentation *NRG1* (22, 23) is also  
209 downregulated under both conditions, although this downregulation occurs slightly more rapidly  
210 in vivo (Fig. 5E).

211 Consistent with the temporal pattern for the expression of hyphae-induced TFs in vitro,  
212 the expression of hyphae-associated target genes *ALS3*, *ECE1*, *HWP1*, *HYP1* and *IHD1* show  
213 the same peak and decline over time. Once again, the tempo for the expression of these genes

214 in vivo is distinct with a more gradual increase followed by relatively stable expression over the  
215 time course (Fig. 6A-E). We also examined the expression of the yeast-specific cell wall protein  
216 *YWP1* (24) over the time course to see if the reduced expression of hyphae-associated genes  
217 was accompanied by a corresponding increase the expression of a yeast associated gene. As  
218 shown in Fig. 6F, the expression of *YWP1* declines in both in vitro and in vivo conditions and  
219 remains low relative to yeast with a slight increase in expression under both conditions after a  
220 nadir at 4hr. Thus, despite the reduction in the expression of hyphae-associated TFs and other  
221 hyphae associated gene at later time points in vitro, expression of the *YWP1* remains low at  
222 those same time points relative to yeast phase cells. Overall, the decreased expression of  
223 hyphae-associated genes at later time points correlates with the decrease in the proportion of  
224 filaments after a peak between at approximately 4hr. The expression of the same genes in vivo  
225 is stable over the same time period and also correlates with the stable extent of filamentation  
226 over the same time points in vivo.

227 **Over a 24hr time course in vitro filaments generate lateral yeast but in vivo filaments do**  
228 **not.**

229 In vitro, yeast cells begin to emerge at subapical cell bodies in a process termed, the  
230 hyphae-to-yeast transition. In our previous large-scale screen comparing in vivo filamentation  
231 between TF mutants and WT in one-to-one competition experiments (over 150 replicates of WT,  
232 ref. 7), we observed very few lateral yeasts on in vivo filaments at the 24hr point. Although the  
233 hyphae-to-yeast transition remains a relatively understudied aspect of *C. albicans*  
234 morphogenesis (14), lateral yeast formation is linked to the expression of *PES1* (15). Pes1 is a  
235 pescadillo protein that is required for yeast growth and lateral yeast formation as well as biofilm  
236 dispersion (25). We, therefore, compared the expression of *PES1* during in vitro and in vivo  
237 filamentation. In vivo, *PES1* expression drops dramatically to below or at background for the  
238 majority of the time course (Fig. 7A). In contrast, *PES1* expression initially increases during in

239 vitro induction and then falls to essentially background by 12hr post-induction. As reported by  
240 Shen et al., over-expression of *PES1* from the *TET*- promoter leads to increased lateral yeast  
241 cell formation during a variety of in vitro hyphae induction conditions (15). We, therefore, tested  
242 if this was the case for RPMIS using the same strain generated by Shen et al (15); because  
243 previous work indicated that lateral yeast formation tends to increase with time, we extended  
244 this experiment to 24hr (14). Consistent with previous reports, the *tetO-PES1* strain generated  
245 more lateral yeast than a congeneric strain with *PES1* expressed (*pWT-PES1*) from its native  
246 promoter at all time points (Fig. 7B).

247 To determine if increased expression of *PES1* was sufficient to drive lateral yeast  
248 formation in vivo, we labelled the *tetO-PES1* and *pWT-PES1* strains with NEON and iRFP,  
249 respectively and inoculated a 1:1 mixture into the ear. In Fig. 7C, we show representative  
250 examples of lateral yeast identified in vivo which can be compared to hyphal branching with is  
251 shown in Fig. S1A. As shown in Fig. 7D, *tetO-PES1* strain formed dramatically more lateral  
252 yeast than the strain expressing *PES1* from the native promoter. This suggests that the low  
253 expression of *PES1* in vivo contributes to the near absence of lateral yeast and that increased  
254 *PES1* expression is able to drive lateral yeast formation in vivo. Interestingly, increased  
255 expression of *PES1* in vitro under some conditions reduces hyphae formation and the length of  
256 hyphae (15). However, the *tetO-PES1* strain formed hyphae to the same extent with similar  
257 lengths as the comparator strain (Fig. 7E&F).

258 Finally, reduced cAMP-PKA pathway activity has also been shown to increase the  
259 hyphae-to-yeast transition in vitro (26, 27). We found that mutants lacking the PKA pathway  
260 components *Cyr1* and *Tpk1/2* are able to form filaments in vivo (9). We, therefore, examined  
261 these strains for in vivo lateral yeast formation but found no significant difference relative control  
262 strains (Fig. S1B&C). For these experiments, we compared the *tetO-PES1/pes1Δ* strain to  
263 the corresponding *pes1Δ/PES1* heterozygous mutant. Therefore, it is possible that the

264 heterozygous *pes1Δ/PES1* has lower lateral yeast formation due to haploinsufficiency (15).  
265 However, the lateral yeast formed by the *pes1Δ/PES1* mutant is not different than those formed  
266 by a SC5314-derived reference strain with both alleles of *PES1* (Fig. S1&C). Taken together,  
267 our data indicate that in the first 24hr of filamentation in vivo lateral yeast formation is extremely  
268 rare and that low *PES1* expression throughout the course of filamentation is likely to be a  
269 contributing factor.

## 270 **Discussion**

271 Hyphal morphogenesis remains one of the most intensely studied aspects of *C. albicans*  
272 pathobiology (3). Most of this work has taken advantage of the wide range of in vitro media and  
273 conditions that induce the transition of *C. albicans* from a budding yeast morphology to the  
274 filamentous hyphal and pseudohyphae. We have begun to characterize this transition in  
275 mammalian tissue through the use of a in vivo imaging approach (6, 7, 8, 9). Here, we  
276 compared the time-dependence of in vivo filamentation and in the setting of a commonly used  
277 “host-like” induction condition (RPMI+10%BCS at 37°C). Although we have found some  
278 significant differences between in vivo and in vitro conditions, it is important to first point out the  
279 similarities, particularly during early time points. The rapid induction of positive regulators and  
280 repression of the major repressor of filamentation is observed under both conditions. By 2hr,  
281 there is significant overlap in the transcriptional responses based on a set of genes selected to  
282 include hyphae-related genes and environmentally responsive genes.

283 Generally speaking, recent studies have emphasized the fact that many features of  
284 hyphal morphogenesis are dependent upon the specific conditions used to induce that  
285 transformation (13). In the two conditions we studied, it appears that glucose availability is low in  
286 vitro. This conclusion is based on the rapid increase in the expression of genes related to  
287 gluconeogenesis and alternative carbon metabolism in vitro but not in vivo. One possibility for

288 this difference is that in vitro cultures have a fixed amount of glucose and other nutrients; once  
289 the fixed amount of glucose is depleted, the cells must switch to alternative carbon source  
290 metabolism. In vivo, *C. albicans* is in another organism that is delivering glucose and nutrients  
291 to its tissues and, as a result, delivering nutrients to *C. albicans*. After 12hr, genes such as that  
292 for alternative oxidase, *AOX2*, are beginning to be expressed at high levels, suggesting that the  
293 organism is experiencing reduced glucose delivery. This may be due to the beginning of  
294 abscess formation or tissue damage and necrosis, leading to disrupted blood flow in the region.

295         The most striking difference between these two conditions is that the expression of  
296 positive transcriptional regulators of hyphae morphogenesis and their targets declines sharply in  
297 vitro after a peak at the 4hr time point. This reduction in hyphae-associated gene expression  
298 correlates with a reduction in the filament-to-yeast ratio between 4hr and 12hr in vitro. The  
299 reduction in the filament-to-yeast ratio in vitro also correlates with the appearance of lateral  
300 yeast and follows a peak in the expression of the positive regulator of lateral yeast cell  
301 development, *PES1*. These observations suggest that the population of cells begins to express  
302 features of the hyphae-to-yeast transition after ~4hr induction. In biofilm conditions, the lateral  
303 yeast cells lead to dispersion of yeast cells into the media and we suggest that the increase in  
304 lateral yeast cells between 2-4hr and the increase in planktonic yeast cells after 4hr may both  
305 be due to the hyphae-to-yeast transition (15, 25). Finally, the increase in lateral yeast formation  
306 in a strain that overexpresses *PES1* in vitro further supports the conclusion that this process is  
307 governed, at least in part, by this protein.

308         In vivo, we observed very little evidence of the hyphae-to-yeast transition during the  
309 time course examined. Furthermore, we have observed very few lateral yeasts in vivo up to  
310 24hr post-infection and the filament-to-yeast ratios are stable over the same time period (7).  
311 Once again, these morphological observations can be correlated with the expression patterns of  
312 positive regulators of hyphae and the best characterized positive regulator of lateral yeast

313 formation, *PES1*. Specifically, the expression of hyphae-induced transcriptional regulators  
314 (*BRG1*, *TEC1*, and *UME6*) increases over the first 1hr and then largely remains stable over the  
315 next 12hr and appears to maintain this pattern up to 24hr post infection based on previously  
316 reported data (7). This suggests that, in contrast to in vitro hyphae formation, the hyphal  
317 transcriptional program remains active throughout the first 12-24hr of in vivo infection.

318 *PES1* expression rapidly drops to near undetectable levels in vivo and remains low over  
319 the time course. Because lack of *PES1* expression inhibits lateral yeast formation in vitro (15,  
320 25), this low expression seems likely to contribute to the low numbers of lateral yeast in vivo. As  
321 our data indicates, *PES1* expression from a heterologous promoter drives lateral yeast  
322 formation in vivo at a time point when it does not normally occur. Accordingly, this indicates that  
323 *PES1* expression is sufficient to trigger lateral yeast formation in vivo and strongly supports the  
324 conclusion that low expression of *PES1* is likely to contribute, at least in part, to the low rate of  
325 lateral yeast formation in vivo. This low level of *PES1* expression is not unique to the ear  
326 infection site and we have found similarly low levels of *PES1* expression in both infected kidney  
327 and tongue 24hr post-infection (7, 9, 28). Because of its role in virulence, it seems likely that its  
328 effects are most important after the initial establishment of infection. Indeed, Uppuluri et al.  
329 concluded that the role of *PES1* is most important after the establishment of infection based on  
330 the time dependence of its effect on fungal burden (29). Our observation of low expression of  
331 *PES1* in vivo is consistent with their findings and conclusions.

332 Our apparent inability to find strong evidence for the hyphae-to-yeast transition in vivo  
333 raises the interesting question: why not? A very simple explanation for the low rate of hypha-to-  
334 yeast transition in vivo may be that the transition may occur later during infection. The high  
335 expression of positive transcriptional regulators indicates that hyphal transcriptional program is  
336 consistently maintained though out the 24hr period we studied. As such, it seems very possible  
337 that the hyphal program begins to wane later in infection, as it does in vitro. Our ability to collect

338 high resolution morphological data at time points beyond 24hr declines because *C. albicans*  
339 begins to form dense micro-abscesses in the ear tissue after 24hr (30).

340 In addition to providing insights into the dynamics of in vivo filamentation, our data have  
341 implications for the study of *C. albicans* filamentation in vitro. Specifically, the both the  
342 transcriptional and morphological features of the filamentation program in a given medium are  
343 likely to vary considerably over time, particularly in later time points. Therefore, it is important to  
344 be sure that the selected time point represents the specific stage of filamentation in which one is  
345 interested.

346 In summary, this work provides insights into the temporal dynamics of filamentation in  
347 mammalian tissue, allowing the identification of similarities and differences with a widely  
348 employed host-like in vitro conditions. Our previous work has found that there are significant  
349 differences in the sets of TFs (7) and protein kinases (9) that regulate in vivo filamentation  
350 relative to in vitro conditions. Many factors are likely to contribute to the differences in the  
351 regulatory factors required for in vivo filamentation. Based on this work, it seems likely that  
352 some of these differences could be due, at least in part, to the distinct environmental conditions  
353 encountered during infection and differences in the tempo of morphogenesis.

354

## 355 **Materials and methods**

356 **Strains and media.** The SC5314-derived *C. albicans* reference strain SN250 was used for all  
357 experiments except for those involving *PES1* mutant strains. The *pes1Δ/PES1* and *tetO-PES1*  
358 strains (15) were generous gifts of Julia Köhler (Harvard) and are in the SC5314 background.  
359 All *C. albicans* strains were precultured overnight in yeast peptone dextrose (YPD) medium at  
360 30°C with shaking. Standard recipes were used to prepare YPD (31). RPMI 1640 medium was  
361 supplemented with bovine calf serum (10% vol/vol).

362 **In vitro hyphal induction.** For in vitro hyphal induction, *C. albicans* strain was incubated  
363 overnight at 30<sup>0</sup>C in YPD media, harvested, and diluted into RPMI + 10% bovine calf serum at a  
364 1:50 ratio and incubated at 37<sup>0</sup>C. Cells were collected at the different time points (e.g., 1hr, 2hr,  
365 4hr, 8hr, and 12hr) and processed for microscopy or RNA isolation as described below.

366 **In vitro characterization of *C. albicans* morphology.** Induced cells were fixed with 1% (v/v)  
367 formaldehyde. Fixed cells were then imaged using the Echo Rebel upright microscope with a  
368 60x objective. The assays were conducted in triplicates on different days to confirm  
369 reproducibility.

370 **In vivo characterization of *C. albicans* morphology.** These assays were performed as  
371 previously described (6). Briefly, 1 X 10<sup>6</sup> WT *C. albicans* cells were inoculated intradermally in  
372 mouse ear (3 mice/time point). Mice (3 mice/time point) were sacrificed at each time points, and  
373 ears were harvested. One ear/mouse was immediately submerged into the ice-cold RNA later  
374 solution and another ear used for the imaging. A multiple Z stacks (minimum 20) were acquired  
375 and used it to score the yeast vs filamentous ratio. Round and/or budded cells were considered  
376 “Yeast”, whereas if the cells contain intact mother and filamentous which was at least twice the  
377 length of the mother body, were considered “filamentous.” Lateral yeast cells were distinguished  
378 from branching hyphae by requiring lateral yeast cells to be no more than two cell body lengths  
379 long and have curved than parallel cell walls (See Fig. 7C and Fig. S1A). A minimum of 100  
380 cells from multiple fields were scored. Student’s *t* test was performed to define the statistical  
381 significance between the different time points. All animal experiments were approved by the  
382 University of Iowa IACUC.

383 **RNA extraction.** In vitro and in vivo RNA extraction was carried out as described previously (7,  
384 9). For in vitro RNA extraction, cells were collected at the different time points, centrifuged for 2  
385 min at 10K rpm at room temperature and RNA was extracted according to the manufacturer



386 protocol (MasterPure Yeast RNA Purification Kit). For *in vivo* RNA extraction, mice were  
387 euthanized, ear tissue harvested and the tissue placed into the ice-cold RNA-Later solution. Ear  
388 tissue was then transferred to the mortar and flash frozen with liquid nitrogen. Using pestle, the  
389 frozen was ground to the fine powder. The resulting powder was collected and 1 ml of ice-cold  
390 Trizol was added. The samples were placed on a rocker at RT for 15 min and then centrifuged  
391 at 10K at 4<sup>0</sup> C for 10 min. The cleared Trizol was collected into 1.5 ml Eppendorf tube and 200  
392  $\mu$ l of RNase free chloroform was added to each sample. The tubes were shaken vigorously for  
393 15 s and kept at RT for 5 min followed by centrifuge at 12K rpm at 4<sup>0</sup> C for 15 min. The cleared  
394 aqueous layer was then collected to a new 1.5 ml Eppendorf tube and RNA was further  
395 extracted following the Qiagen RNeasy kit protocol.

396 **NanoString® gene expression analysis.** NanoString analysis was carried out as described  
397 previously (7, 9). Briefly, in total, 40 ng of *in vitro* or 1.4  $\mu$ g of *in vivo* RNA was added to a  
398 NanoString codeset mix and incubated at 65<sup>0</sup> C for 18 hours. After hybridization reaction,  
399 samples were proceeded to nCounter prep station and samples were scanned on an nCounter  
400 digital analyzer. nCounter .RCC files for each sample were imported into nSolver software to  
401 evaluate the quality control metrics. Background subtraction was performed using negative  
402 control probes to establish a background threshold, which was then subtracted from the raw  
403 counts. The resulting background subtracted total raw RNA counts underwent a two-step  
404 normalization process. First normalized against the highest total counts from the biological  
405 triplicates and then to the wild type samples. Differentially expressed genes were defined as  
406 those with  $\pm$  2-fold change in expression with an FDR <0.1 as determined by Benjamini-Yeuketil  
407 procedure when compared to expression in the yeast phase inoculum which was grown  
408 overnight at 30<sup>0</sup>C in rich medium (yeast peptone with 2% dextrose, YPD).

409 **Software.** Quantitative image analysis was carried out using ImageJ software. GraphPad Prism  
410 (V. 9.3.1) was used to plot the graphs and to perform the statistical tests.

411 **Acknowledgements.** The authors thank Julia Köhler (Harvard) for providing *PES1* mutant  
412 strains. The authors also thank Scott Filler (UCLA) and Aaron Mitchell (Georgia) for helpful  
413 discussions and critical review of the manuscript. This work was supported by a National  
414 Institutes of Health Grant, R01AI133409 (DJK).

415

## 416 **References**

- 417 1. Lopes JP, Lionakis MS. 2022. Pathogenesis and virulence of *Candida albicans*.  
418 Virulence 13: 89-121.
- 419 2. Pappas PG, Lionakis MS, Arendrup MC, Ostrosky-Zeichner L, Kullberg BJ. 2018.  
420 Invasive candidiasis. Nat Rev Dis Primers. 4:18026.
- 421 3. Sudbery PE. 2011. Growth of *Candida albicans* hyphae. Nat Rev Microbiol. 9:737-48.
- 422 4. Witchley JN, Penumetcha P, Abon NV, Woolford CA, Mitchell AP, Noble SM. 2019.  
423 *Candida albicans* morphogenesis programs control the balance between gut  
424 commensalism and invasive infection. Cell Host Microbe. 25:432-443.
- 425 5. Tso GHW, Reales-Calderon JA, Tan ASM, Sem X, Le GTT, Tan TG, Lai GC, Srinivasan  
426 KG, Yurieva M, Liao W, Poidinger M, Zolezzi F, Rancati G, Pavelka N. 2018.  
427 Experimental evolution of a fungal pathogen into a gut symbiont. Science. 362:589-595.
- 428 6. Wakade RS, Krysan DJ, Wellington M. 2022. Use of in vivo imaging to screen for  
429 morphogenesis phenotypes in *Candida albicans* mutant strains during active infection in  
430 a mammalian host. J Vis Exp. 212;188. doi: 10.3791/64258.
- 431 7. Wakade RS, Ristow LC, Wellington M, Krysan DJ. 2023. Intravital imaging-based  
432 genetic screen reveals the transcriptional network governing *Candida albicans*  
433 filamentation during mammalian infection. Elife. 12: e85114.

- 434 8. Wakade RS, Huang M, Mitchell AP, Wellington M, Krysan DJ. 2021. Intravital imaging of  
435 *Candida albicans* identifies differential in vitro and in vivo filamentation phenotypes for  
436 transcription factor deletion mutants. *mSphere*. 6: e0043621.
- 437 9. Wakade RS, Kramara J, Wellington M, Krysan DJ. 2022. *Candida albicans* filamentation  
438 does not require the cAMP-PKA pathway in vivo. *mBio*.13: e0085122.
- 439 10. Amorim-Vaz S, Tran Vdu T, Pradervand S, Pagni M, Coste AT, Sanglard D. 2015. RNA  
440 enrichment method for quantitative transcriptional analysis of pathogens in vivo applied  
441 to the fungus *Candida albicans*. *mBio*. 6: e00942-15.
- 442 11. Xu W, Solis NV, Ehrlich RL, Woolford CA, Filler SG, Mitchell AP. 2015. Activation and  
443 alliance of regulatory pathways in *C. albicans* during mammalian infection. *PLoS Biol*.  
444 13: e1002076.
- 445 12. Kadosh D, Johnson AD. 2005. Induction of the *Candida albicans* filamentous growth  
446 program by relief of transcriptional repression: a genome-wide analysis. *Mol Biol Cell*.  
447 16:2903-12.
- 448 13. Azadmanesh J, Gowen AM, Creger PE, Schafer ND, Blankenship JR. 2017.  
449 Filamentation involves two overlapping, but distinct, programs of filamentation in the  
450 pathogenic fungus *Candida albicans*. *G3 (Bethesda)*. 7:3797-3808. doi:  
451 10.1534/g3.117.300224.
- 452 14. Wakade RS, Krysan DJ. 2021. The Cbk1-Ace2 axis guides *Candida albicans* from yeast  
453 to hyphae and back again. *Curr Genet*. 67:461-469.
- 454 15. Shen J, Cowen LE, Griffin AM, Chan L, Köhler JR. 2008. The *Candida albicans*  
455 pescadillo homolog is required for normal hypha-to-yeast morphogenesis and yeast  
456 proliferation. *Proc Natl Acad Sci U S A*. 105:20918-23.

- 457 16. Carman AJ, Vylkova S, Lorenz MC. 2008. Role of acetyl coenzyme A synthesis and  
458 breakdown in alternative carbon source utilization in *Candida albicans*. Eukaryot Cell.  
459 7:1733-41.
- 460 17. Liu Z, Basso P, Hossain S, Liston SD, Robbins N, Whitesell L, Noble SM, Cowen LE.  
461 2023. Multifactor transcriptional control of alternative oxidase induction integrates  
462 diverse environmental inputs to enable fungal virulence. Nat Commun. 14:4528.
- 463 18. Wilson D. 2021. The role of zinc in the pathogenicity of human fungal pathogens. Adv  
464 Appl Microbiol. 117:35-61.
- 465 19. Almeida RS, Wilson D, Hube B. 2009. *Candida albicans* iron acquisition within the host.  
466 FEMS Yeast Res. 9:1000-12.
- 467 20. Carlisle PL, Banerjee M, Lazzell A, Monteagudo C, López-Ribot JL, Kadosh D. 2009.  
468 Expression levels of a filament-specific transcriptional regulator are sufficient to  
469 determine *Candida albicans* morphology and virulence. Proc Natl Acad Sci U S A.  
470 106:599-604.
- 471 21. Glazier VE. 2022. *EFG1*, everyone's favorite gene in *Candida albicans*: a  
472 comprehensive literature review. Front Cell Infect Microbiol. 12:855229.
- 473 22. Braun BR, Kadosh D, Johnson AD. 2001. *NRG1*, a repressor of filamentous growth in *C.*  
474 *albicans*, is downregulated during filament induction. EMBO J. 20:4753-61.
- 475 23. Murad AM, Leng P, Straffon M, Wishart J, Macaskill S, MacCallum D, Schnell N, Talibi  
476 D, Marechal D, Tekaia F, d'Enfert C, Gaillardin C, Odds FC, Brown AJ. 2001. *NRG1*  
477 represses yeast-hypha morphogenesis and hypha-specific gene expression in *Candida*  
478 *albicans*. EMBO J. 20:4742-52.
- 479 24. Granger BL, Flenniken ML, Davis DA, Mitchell AP, Cutler JE. 2005. Yeast wall protein 1  
480 of *Candida albicans*. Microbiology (Reading).151:1631-1644.

- 481 25. Uppuluri P, Chaturvedi AK, Srinivasan A, Banerjee M, Ramasubramaniam AK, Köhler  
482 JR, Kadosh D, Lopez-Ribot JL. 2010, Dispersion as an important step in the *Candida*  
483 *albicans* biofilm developmental cycle. PLoS Pathog. 6: e1000828.
- 484 26. Bahn YS, Staab J, Sundstrom P. 2003. Increased high-affinity phosphodiesterase *PDE2*  
485 gene expression in germ tubes counteracts *CAP1*-dependent synthesis of cyclic AMP,  
486 limits hypha production and promotes virulence in *Candida albicans*. Mol Microbiol.  
487 50:391-409.
- 488 27. Lindsay AK, Deveau A, Piispanen AE, Hogan DA. 2012. Farnesol and cyclic AMP  
489 signaling effects on the hyphae-to-yeast transition in *Candida albicans*. Eukaryot Cell.  
490 11:1219-25.
- 491 28. Solis NV, Wakade RS, Filler SG, Krysan DJ. 2023. *Candida albicans* oropharyngeal  
492 infection is an exception to iron-based nutritional immunity. mBio. 14: e0009523.
- 493 29. Uppuluri P, Chaturvedi AK, Jani N, Pukkila-Worley R, Monteagudo C, Mylonakis E,  
494 Köhler JR, Lopez Ribot JL. 2012. Physiologic expression of the *Candida albicans*  
495 pescadillo homolog is required for virulence in a murine model of hematogenously  
496 disseminated candidiasis. Eukaryot Cell. 11:1552-6.
- 497 30. Mitra S, Dolan K, Foster TH, Wellington M. 2010. Imaging morphogenesis of *Candida*  
498 *albicans* during infection in a live animal. J Biomed Opt.15:010504.
- 499 31. Homann OR, Dea J, Noble SM, Johnson AD. 2009. A phenotypic profile of the *Candida*  
500 *albicans* regulatory network. PLoS Genet. 5: e1000783.

501

## 502 **Data Availability Statement**

503 All raw (source) data and normalized data large-scale expression data generated by Nanostring  
504 are provided in Supplementary Tables 1 and 2. The bright field and confocal microscopy Z-  
505 stacks and images used to characterize *C. albicans* morphology at the different time points are

506 very large files that are not easily deposited or annotated for deposit in public repositories.

507 Therefore, the source data for the imaging figures are available from the corresponding author

508 to interested investigators on reasonable request.

509

510

511

512

513

## 514 **Figure Legends**

515 **Figure 1. Time course of in vivo *C. albicans* filamentation. A.** Diagram of time course

516 experiment. **B.** Representative 2-D fields from confocal microscopy of NEON-labeled SN250

517 strain in ear tissue at the indicated time points after infection. **C.** Quantification of percent

518 filamentous cells at the indicated time points. Asterisks indicated significant difference between

519 time points ( $p < 0.05$  \*, ANOVA with Tukey's method of multiple comparison correction). **D.** The

520 length of filaments at the indicated time points. Asterisks indicate significant difference between

521 the groups ( $p < 0.05$  \*, Mann Whitney test).

522

523 **Figure 2. Time course of in vivo *C. albicans* filamentation. A.** Representative bright field

524 images of cell morphology following hyphal induction in RPMI tissue culture medium

525 supplemented with 10% bovine calf serum at 37°C for the indicated times. **B.** Quantification of

526 percent filamentous cells at the indicated time points. Asterisk indicated significant difference

527 between time points ( $p < 0.05$  \*, ANOVA with Tukey's method of multiple comparison

528 correction). **C.** The length of filaments at the indicated time points. Asterisks indicate significant

529 difference between the groups ( $p < 0.05$  \*, Mann Whitney test).

530

531 **Figure 3. Nanostring analysis of gene expression over time for in vivo and in vitro**  
532 **filamentation.** Volcano plots showing genes with significant ( $\log_2 \pm 1$ ;  $FDR < 0.1$ , Benjamini  
533 method) increase (red dots) or decrease (blue dots) at the indicated time points for in vivo  
534 filamentation (**A**) and in vitro filamentation (**B**). Expression is normalized to yeast phase cells  
535 used to infect mice or inoculate in vitro cultures. The numbers in the two quadrants indicate total  
536 number of differentially expressed genes for that region of the plot.

537

538 **Figure 4. Distinct patterns of upregulated genes during in vitro and in vivo filamentation.**  
539 Venn diagrams comparing the profiles of upregulated genes in vitro and in vivo at 1hr (**A**); 2hr  
540 (**B**); 4hr (**C**); 8hr (**D**) and 12hr (**E**). **F.** Set of alternative carbon metabolism genes upregulated at  
541 the 2hr time point during in vitro induction relative to yeast inoculum (\* indicates  $FDR < 0.1$ ) but  
542 not significantly different from inoculum in vivo. **G.** Set of hypha-associated genes upregulated  
543 in vivo at the 12hr time point relative to yeast inoculum (\* indicates  $FDR < 0.1$ ) but not  
544 significantly different from inoculum in vitro. Bars indicate normalized mRNA counts from three  
545 independent experiments with error bars indicating standard deviation.

546

547 **Figure 5. Comparison the dynamics of expression for hyphae-associated transcriptional**  
548 **regulators during in vitro and in vivo filamentation.** **A.** Normalized mRNA counts for the  
549 expression of *UME6* (**A**), *BRG1* (**B**), *TEC1* (**C**), *EFG1* (**D**), and *NRG1* (**E**) at the indicated time  
550 points. Bars indicate normalized mRNA counts from three independent experiments with error  
551 bars indicating standard deviation.

552

553 **Figure 6. Comparison the dynamics of expression for hyphae- and yeast associated**  
554 **genes during in vitro and in vivo filamentation.** **A.** Normalized mRNA counts for the  
555 expression of *ECE1* (**A**), *HWP1* (**B**), *ALS3* (**C**), *HYR1* (**D**), *IHD1* (**E**) and *YWP1* (**F**) at the

556 indicated time points. Bars indicate normalized mRNA counts from three independent  
557 experiments with error bars indicating standard deviation.

558

559 **Figure 7. Heterologous expression of *PES1* is sufficient to induce lateral yeast formation**

560 **in vivo. A.** Normalized mRNA counts for the expression of *PES1*. Bars indicate normalized  
561 mRNA counts from three independent experiments with error bars indicating standard deviation.

562 **B.** Effect of heterologous expression of *PES1* on lateral yeast formation over time course of in  
563 vitro hyphal induction. Bars indicate percentage of filaments with lateral yeast cells. \* indicates  
564 statistically significant difference between groups (two-way ANOVA corrected for multiple  
565 comparisons with Sidak's test). **C.** Representative images of lateral yeast in vitro and in vivo. **D.**

566 Lateral yeast formation in vivo for *pes1Δ/PES1* and *tetO-PES1* 24hr post-infection. Bars indicate  
567 means from two independent experiments with standard deviation indicated by error bars. \*\*\*\*

568 indicates  $p < 0.0001$  by Student's t test. **E.** Representative images of the *pes1Δ/PES1* and *tetO-*  
569 *PES1* mutant morphologies in vivo. **F.** Quantification of % filamentous cells and filament length  
570 for the *pes1Δ/PES1* and *tetO-PES1* mutant strains. NS indicates no significant difference by  
571 Student's t test (% filamentous cells) and Mann-Whitney test (filament length).

572

573 **Supplementary Tables and Figure**

574 **Table S1.** Nanostring data for in vivo time course with raw counts, background corrected  
575 counts, normalized counts, fold change for each gene relative to either yeast phase, Student t-  
576 test values, and FDR calculated by the Benjamini-Yekutieli method. Differentially expressed  
577 genes were defined as those genes with  $\pm 2$ -fold change in expression with FDR  $< 0.1$ .

578 Significantly upregulated genes are indicated by green fold change values at the time point in  
579 which they are differentially expressed; red indicates downregulated at that time point.

580



581 **Table S2.** Nanostring data for in vitro time course with raw counts, background corrected  
582 counts, normalized counts, fold change for each gene relative to yeast phase, Student's test  
583 values, and FDR calculated by the Benjamini-Yekutieli method. Differentially expressed genes  
584 were defined as those genes with  $\pm$  2-fold change in expression with FDR <0.1. Significantly  
585 upregulated genes are indicated by green fold change values at the time point in which they are  
586 differentially expressed; red indicates downregulated at that time point.

587

588 **Supplementary Figure S1. A.** Representative images of hyphal branching in vitro and in vivo.  
589 Lateral yeast formation in vivo for *cyr1* $\Delta\Delta$  (**B**) and *tpk1* $\Delta\Delta$  *tpk2* $\Delta\Delta$  (**C**) mutants 24hr post-  
590 infection. Bars indicate means from two independent experiments with standard deviation  
591 indicated by error bars. There were no significant differences ( $p > 0.05$ ) between groups by  
592 Student's t test.

593

594

595

## Figure 1

**A**

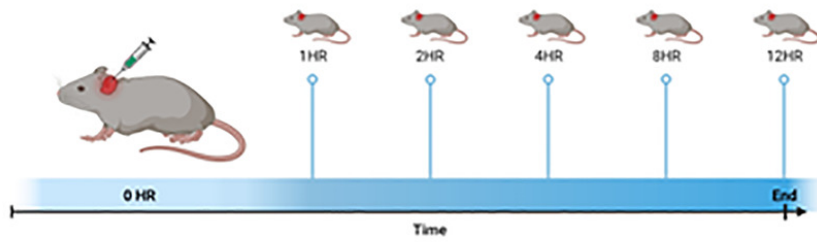

**B**

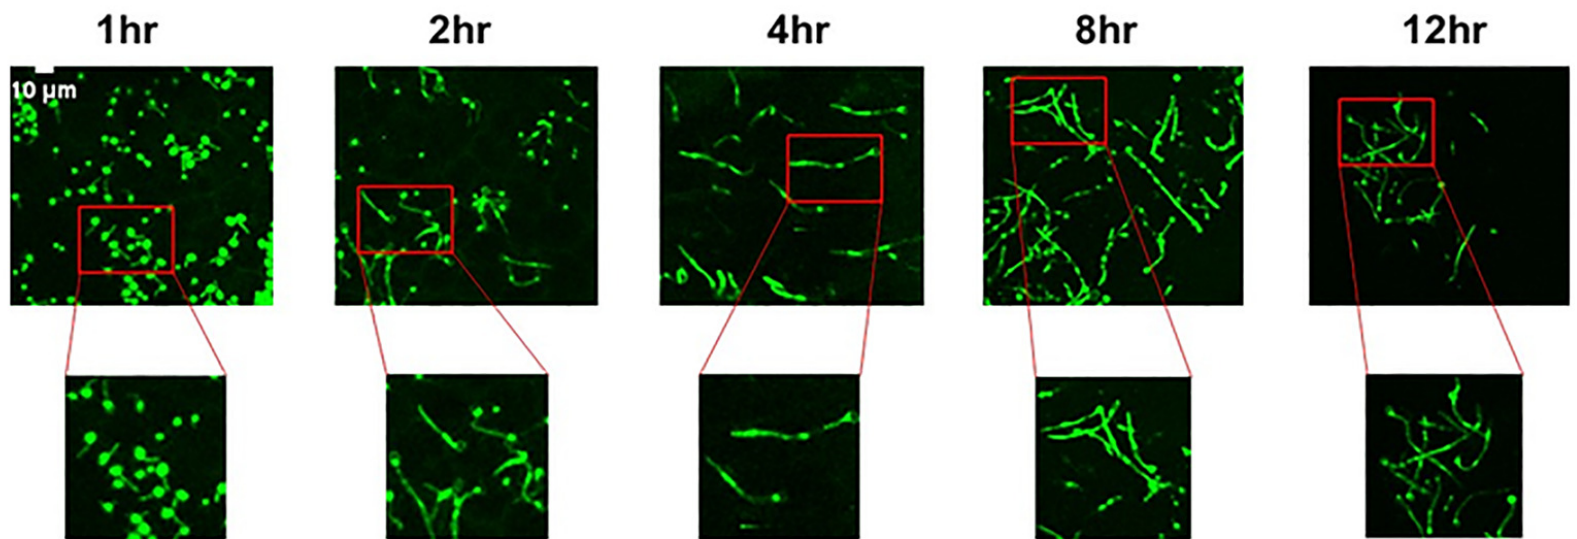

**C**

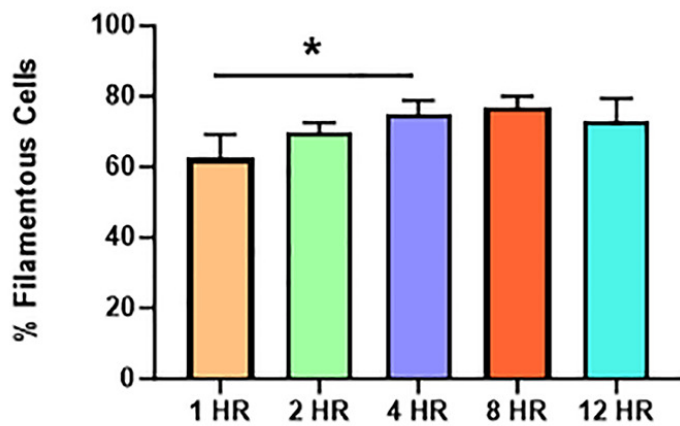

**D**

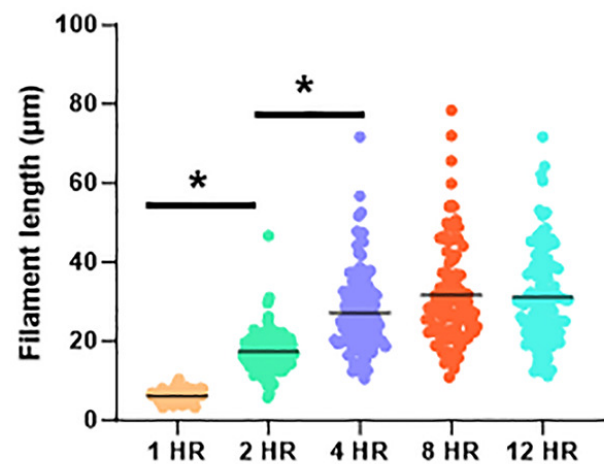

Figure 2

A

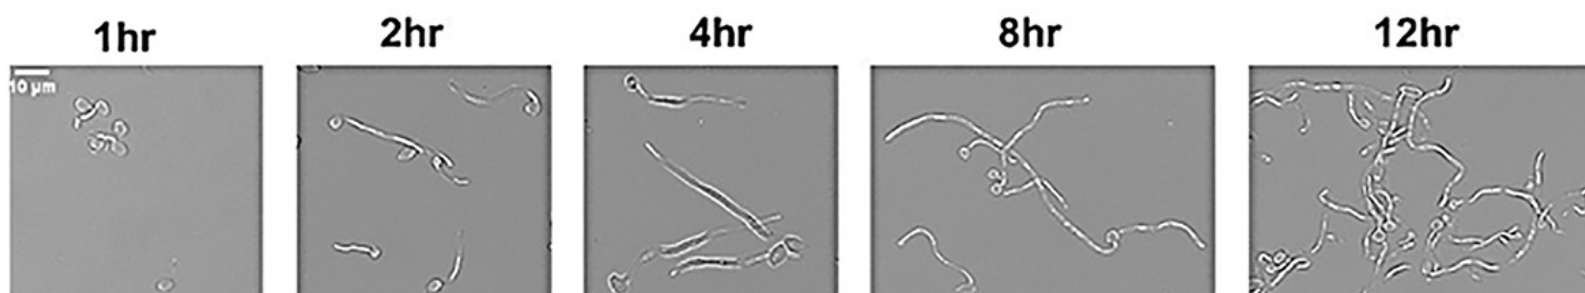

B

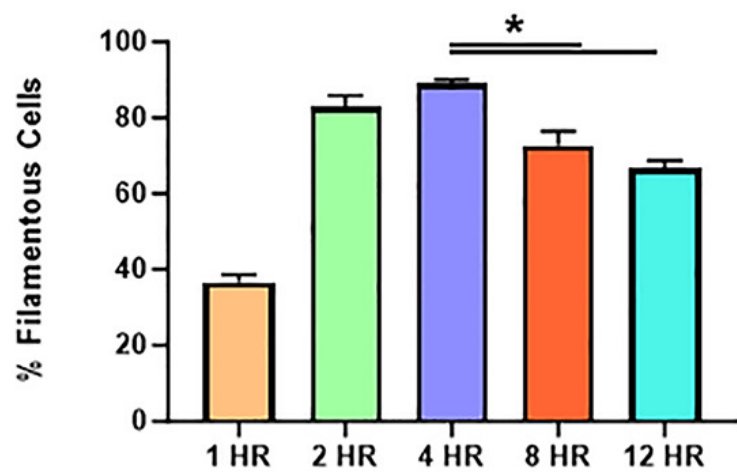

C

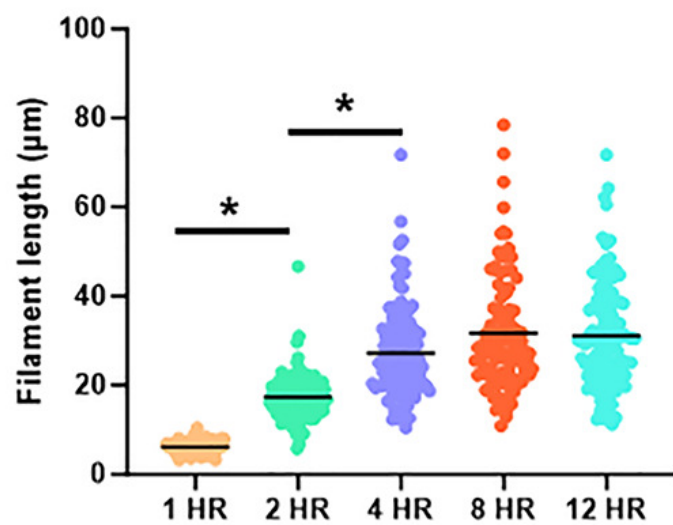

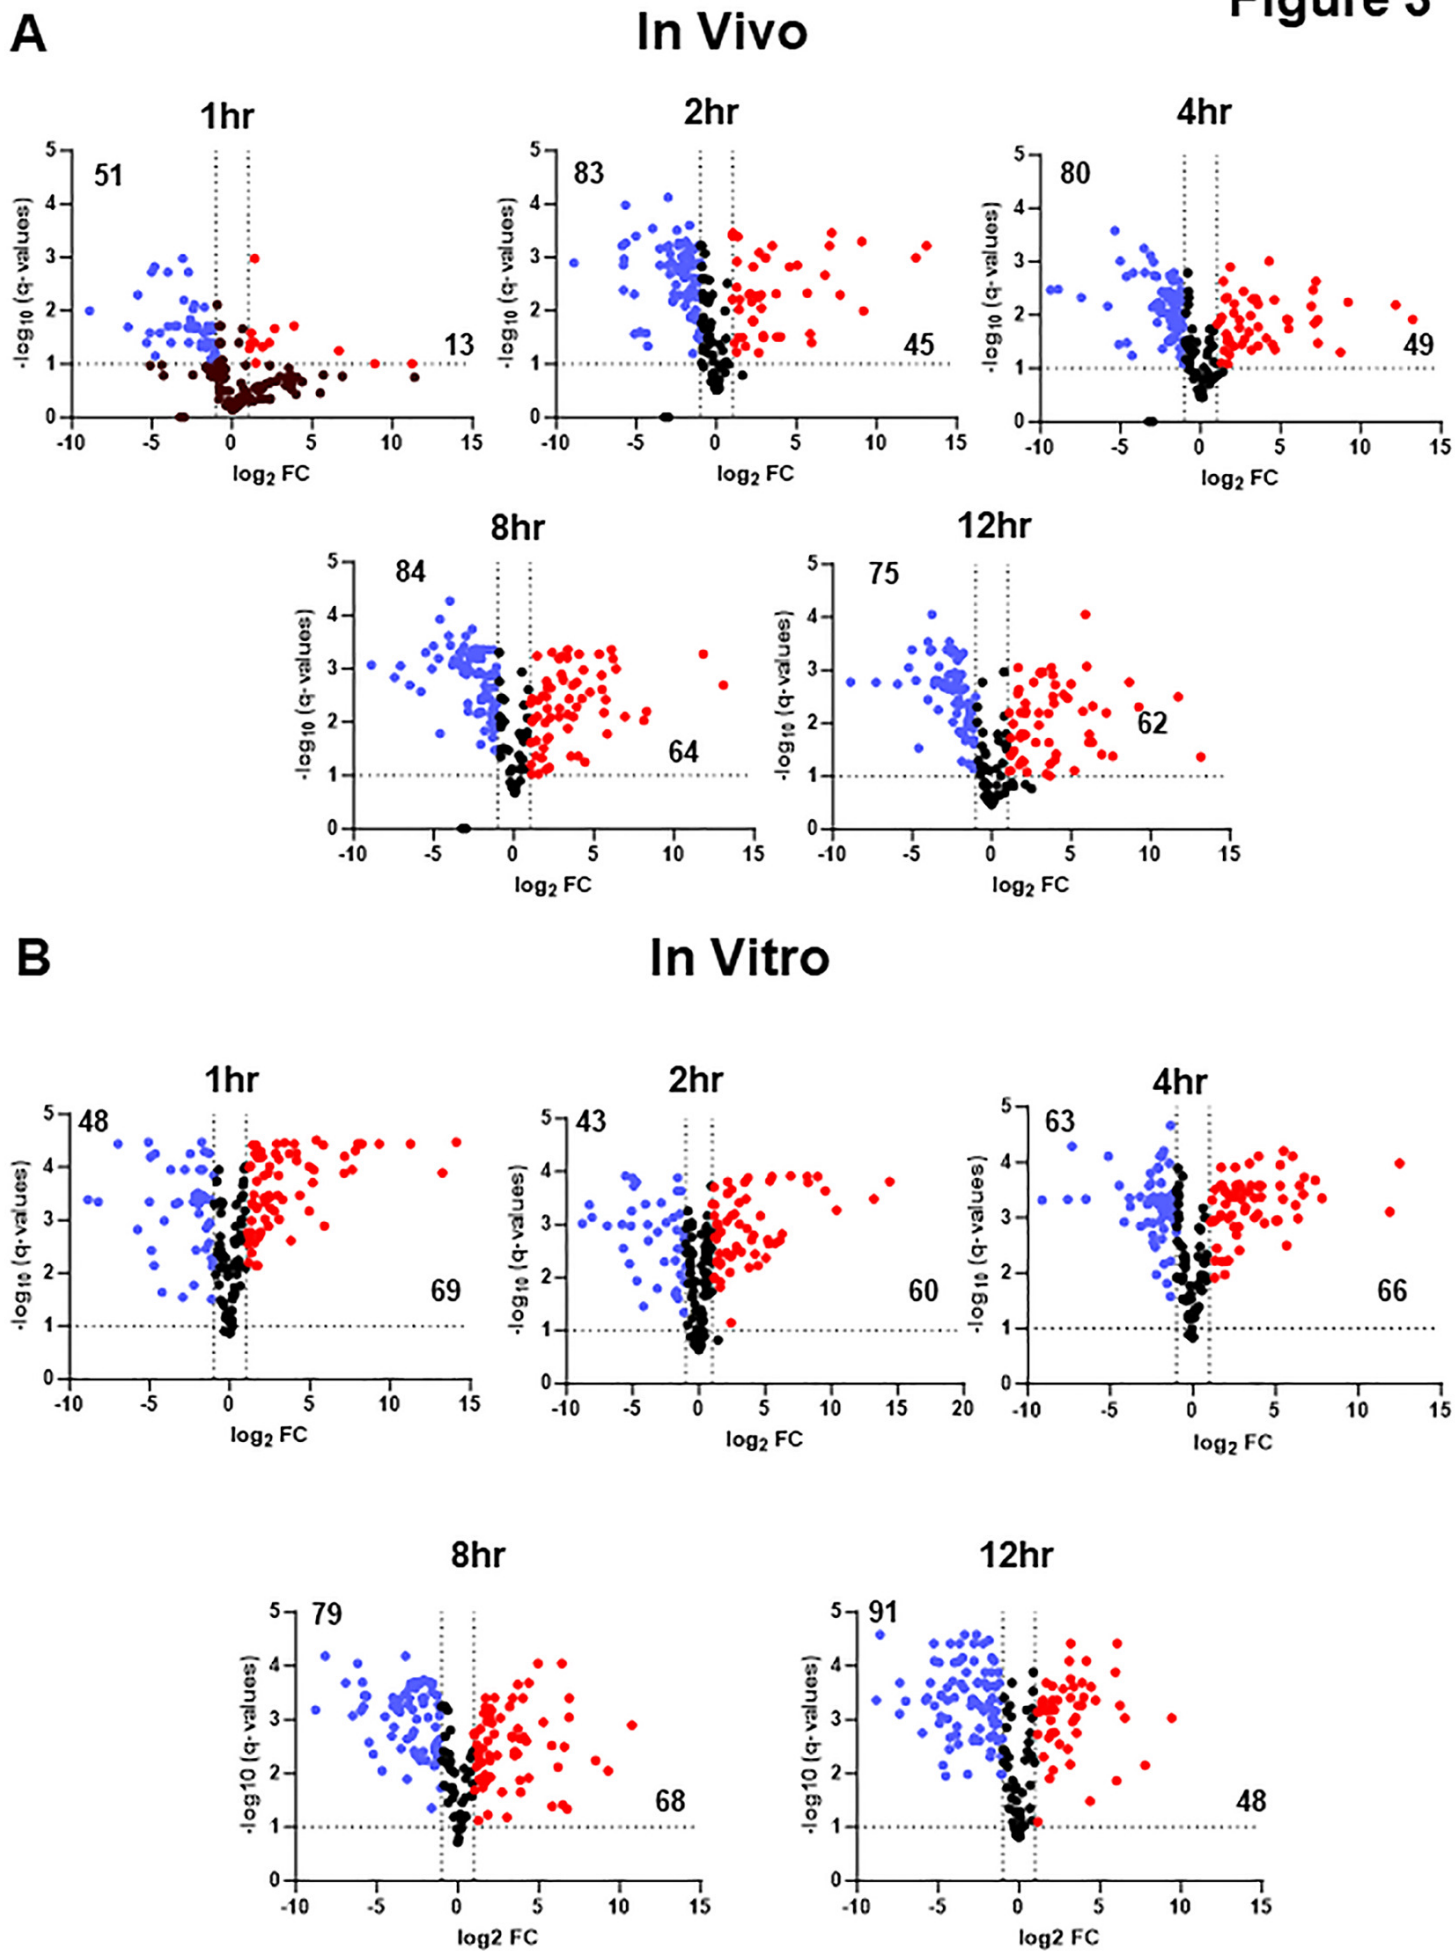

**Figure 4**

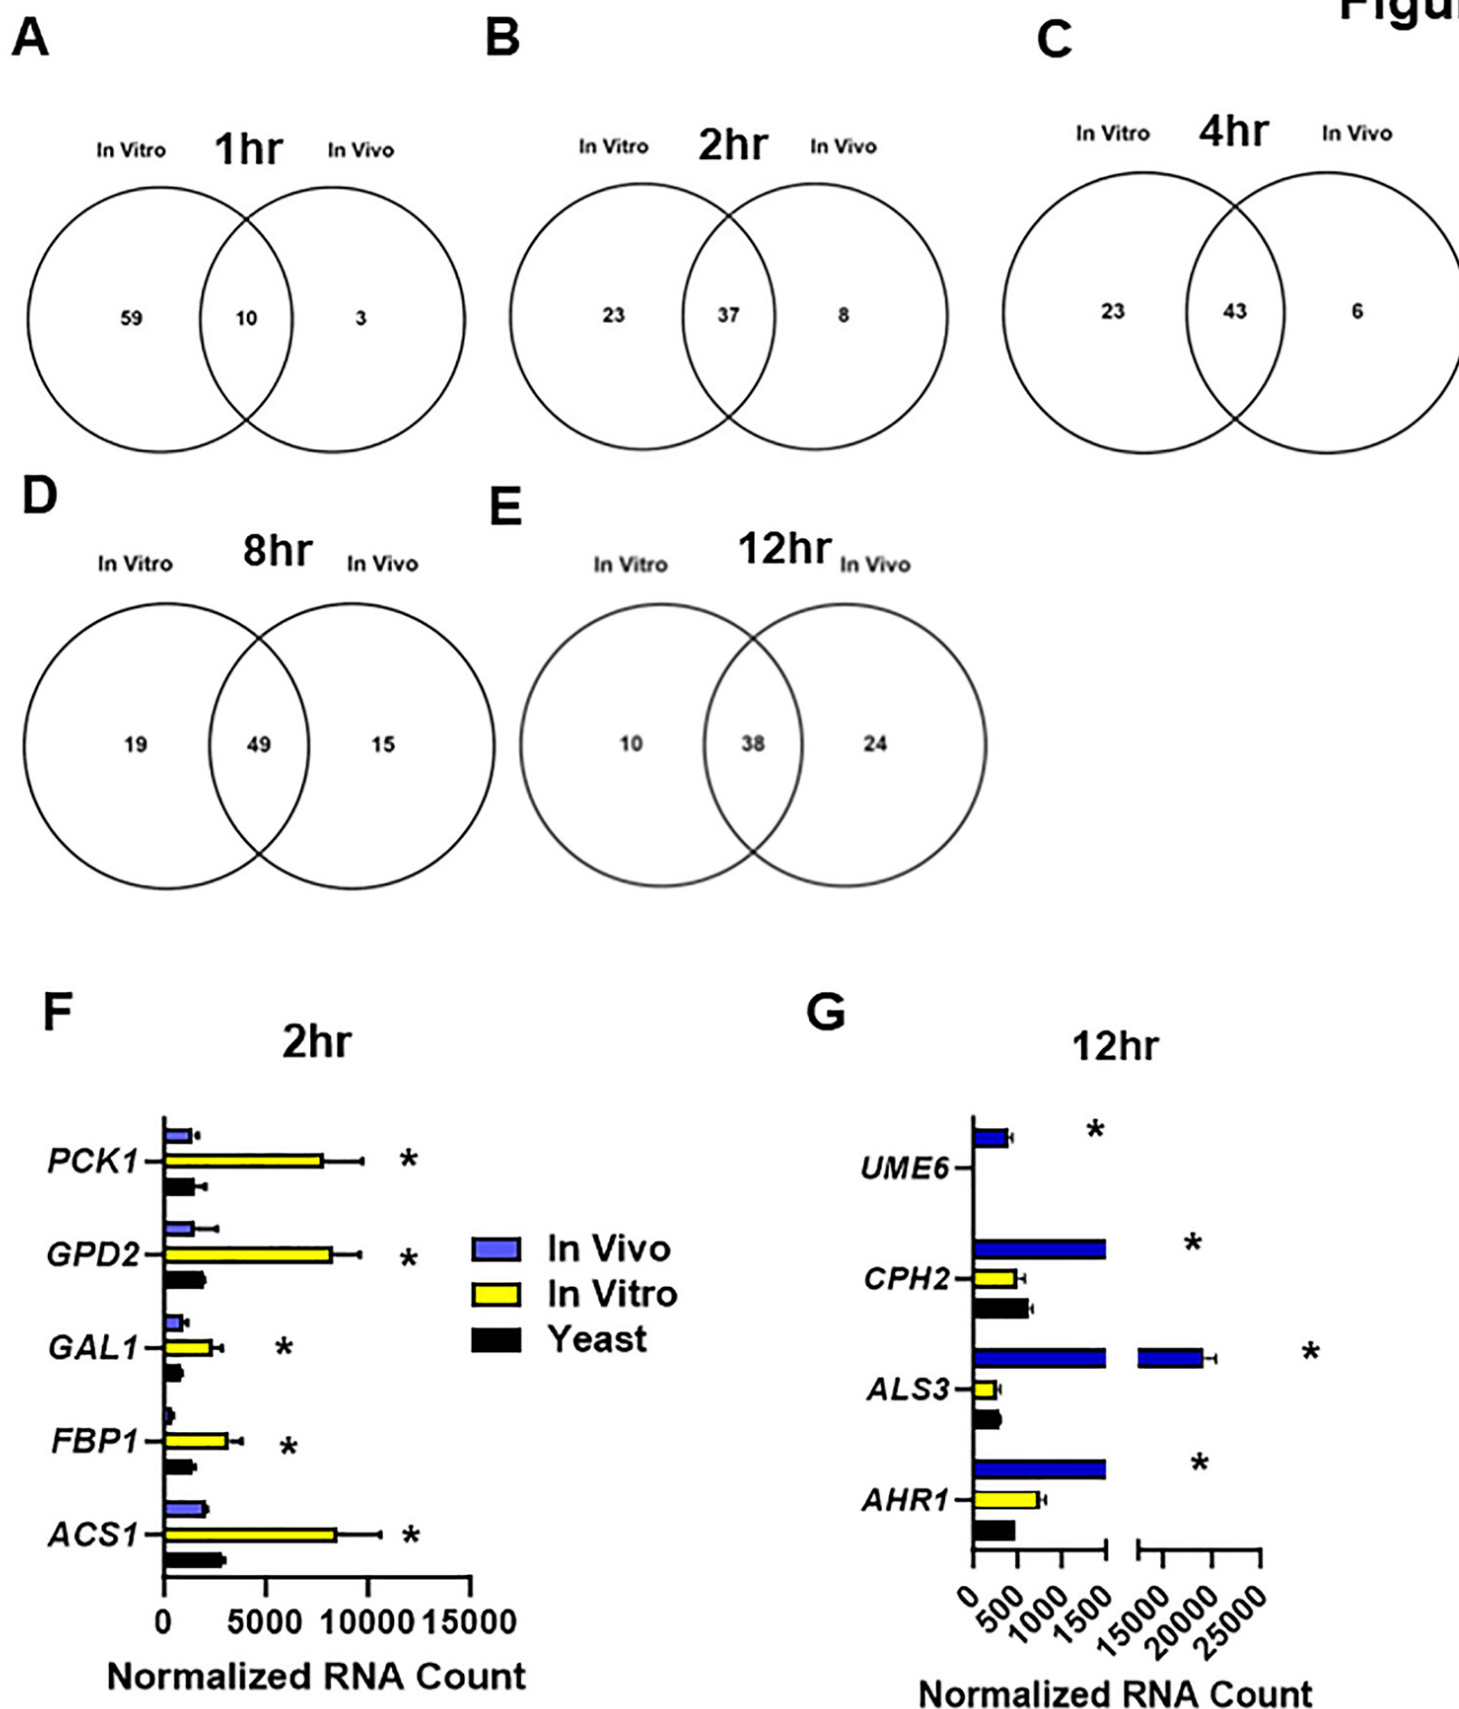

## Figure 5

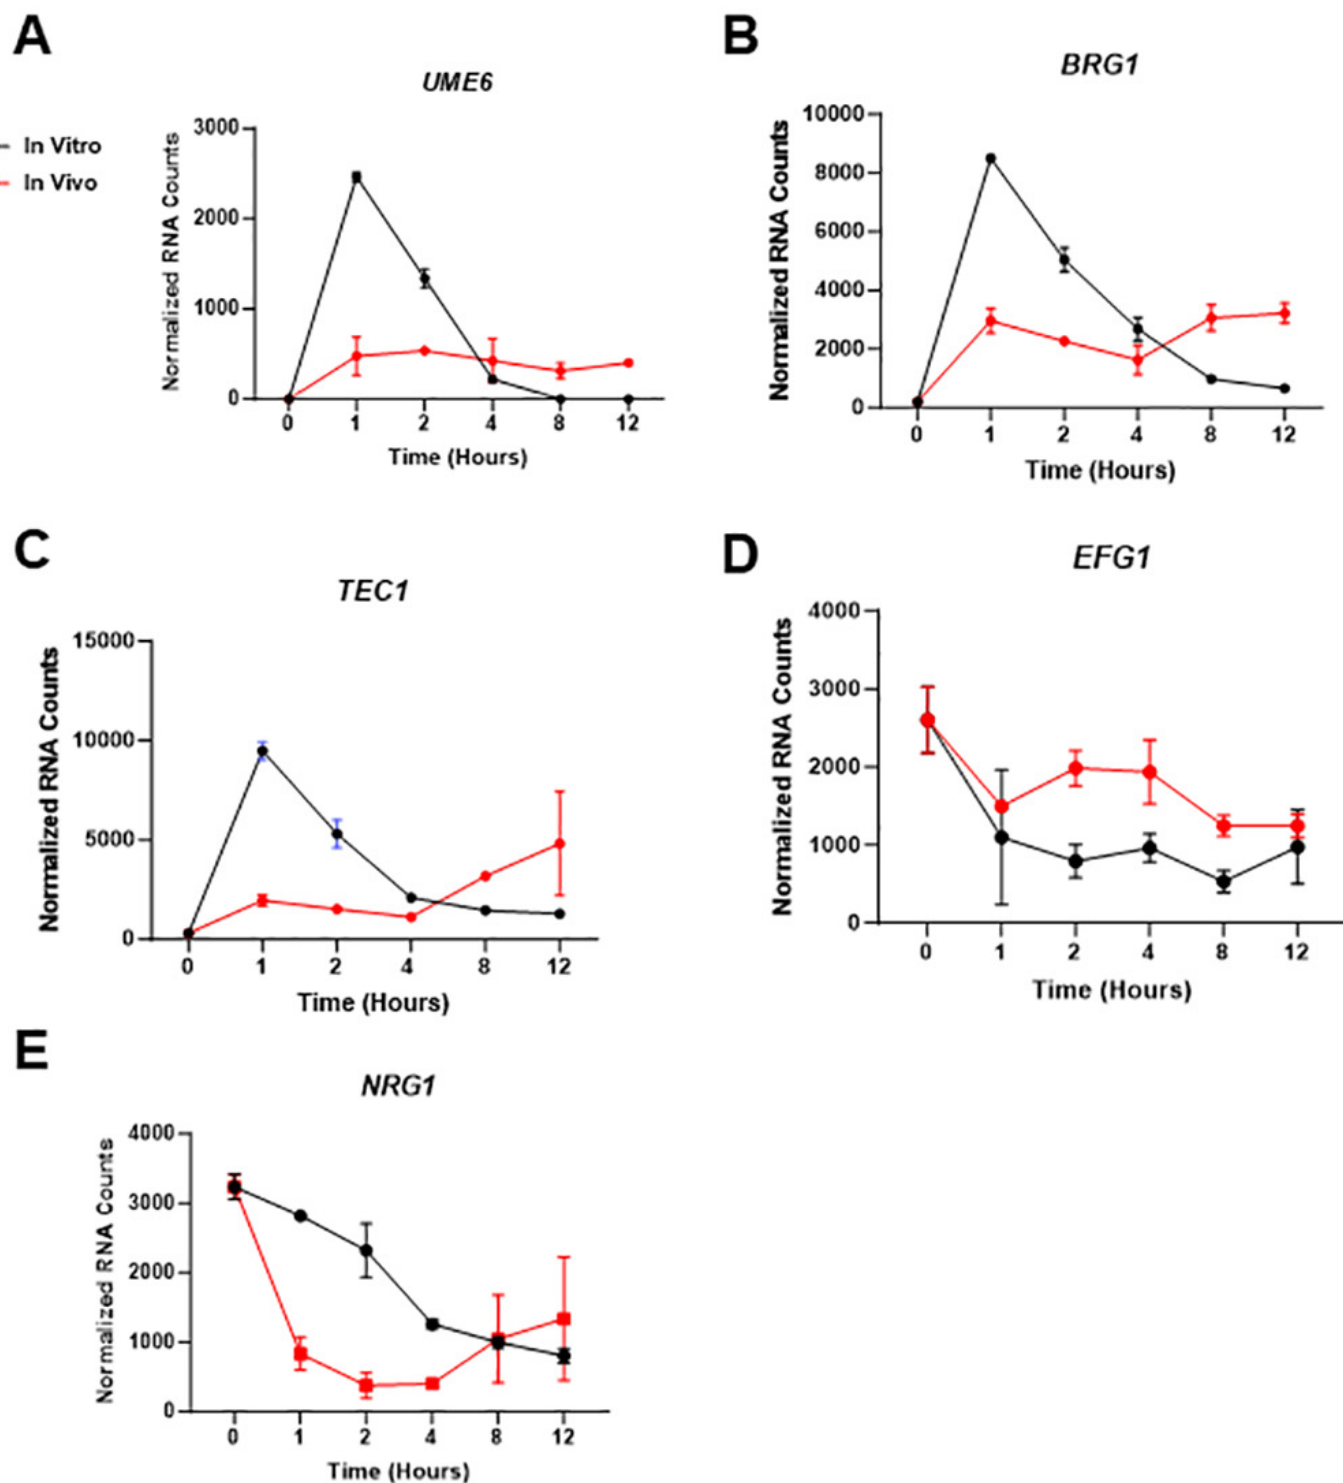

## Figure 6

**A**

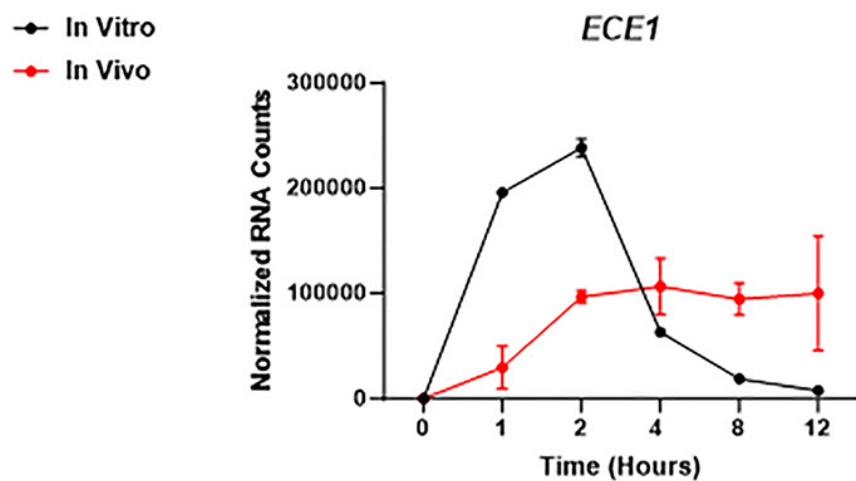

**B**

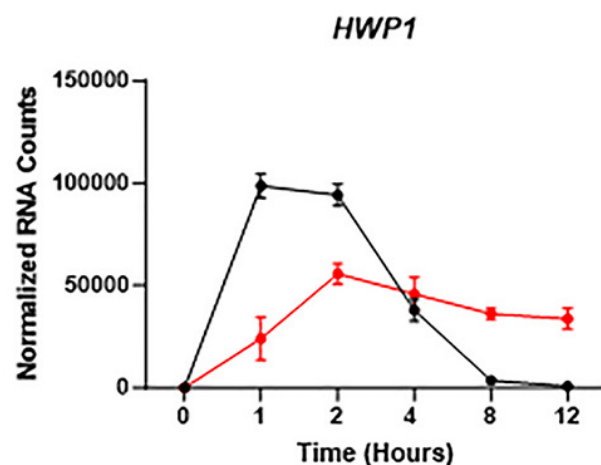

**C**

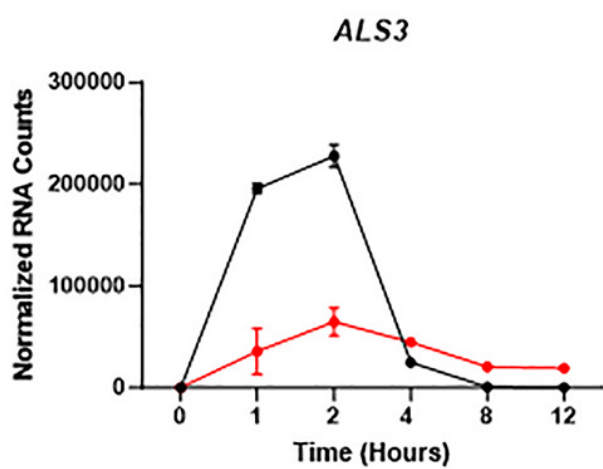

**D**

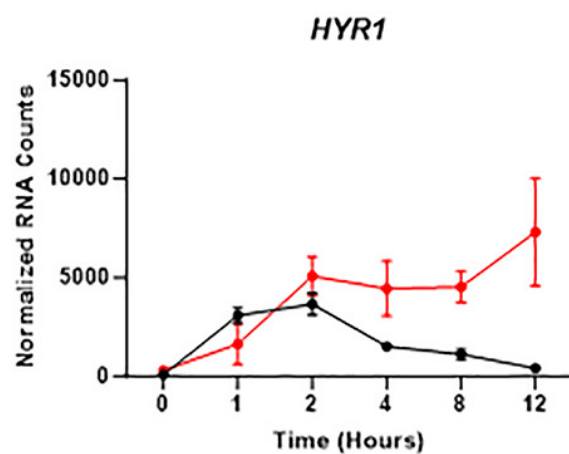

**E**

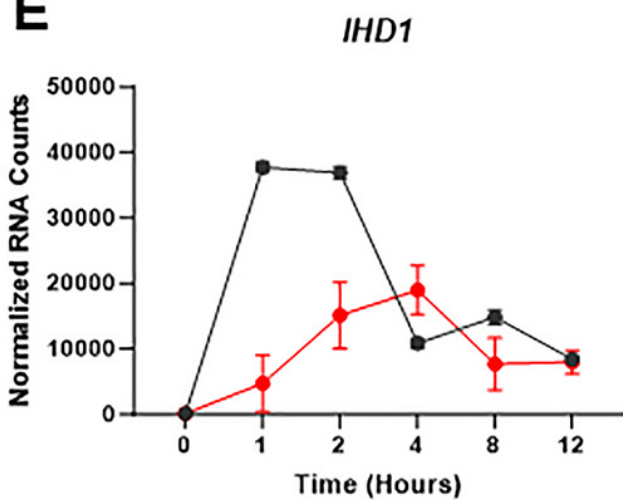

**F**

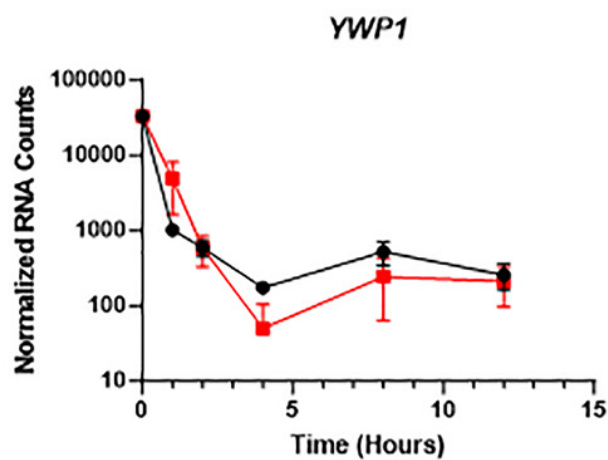

## Figure 7

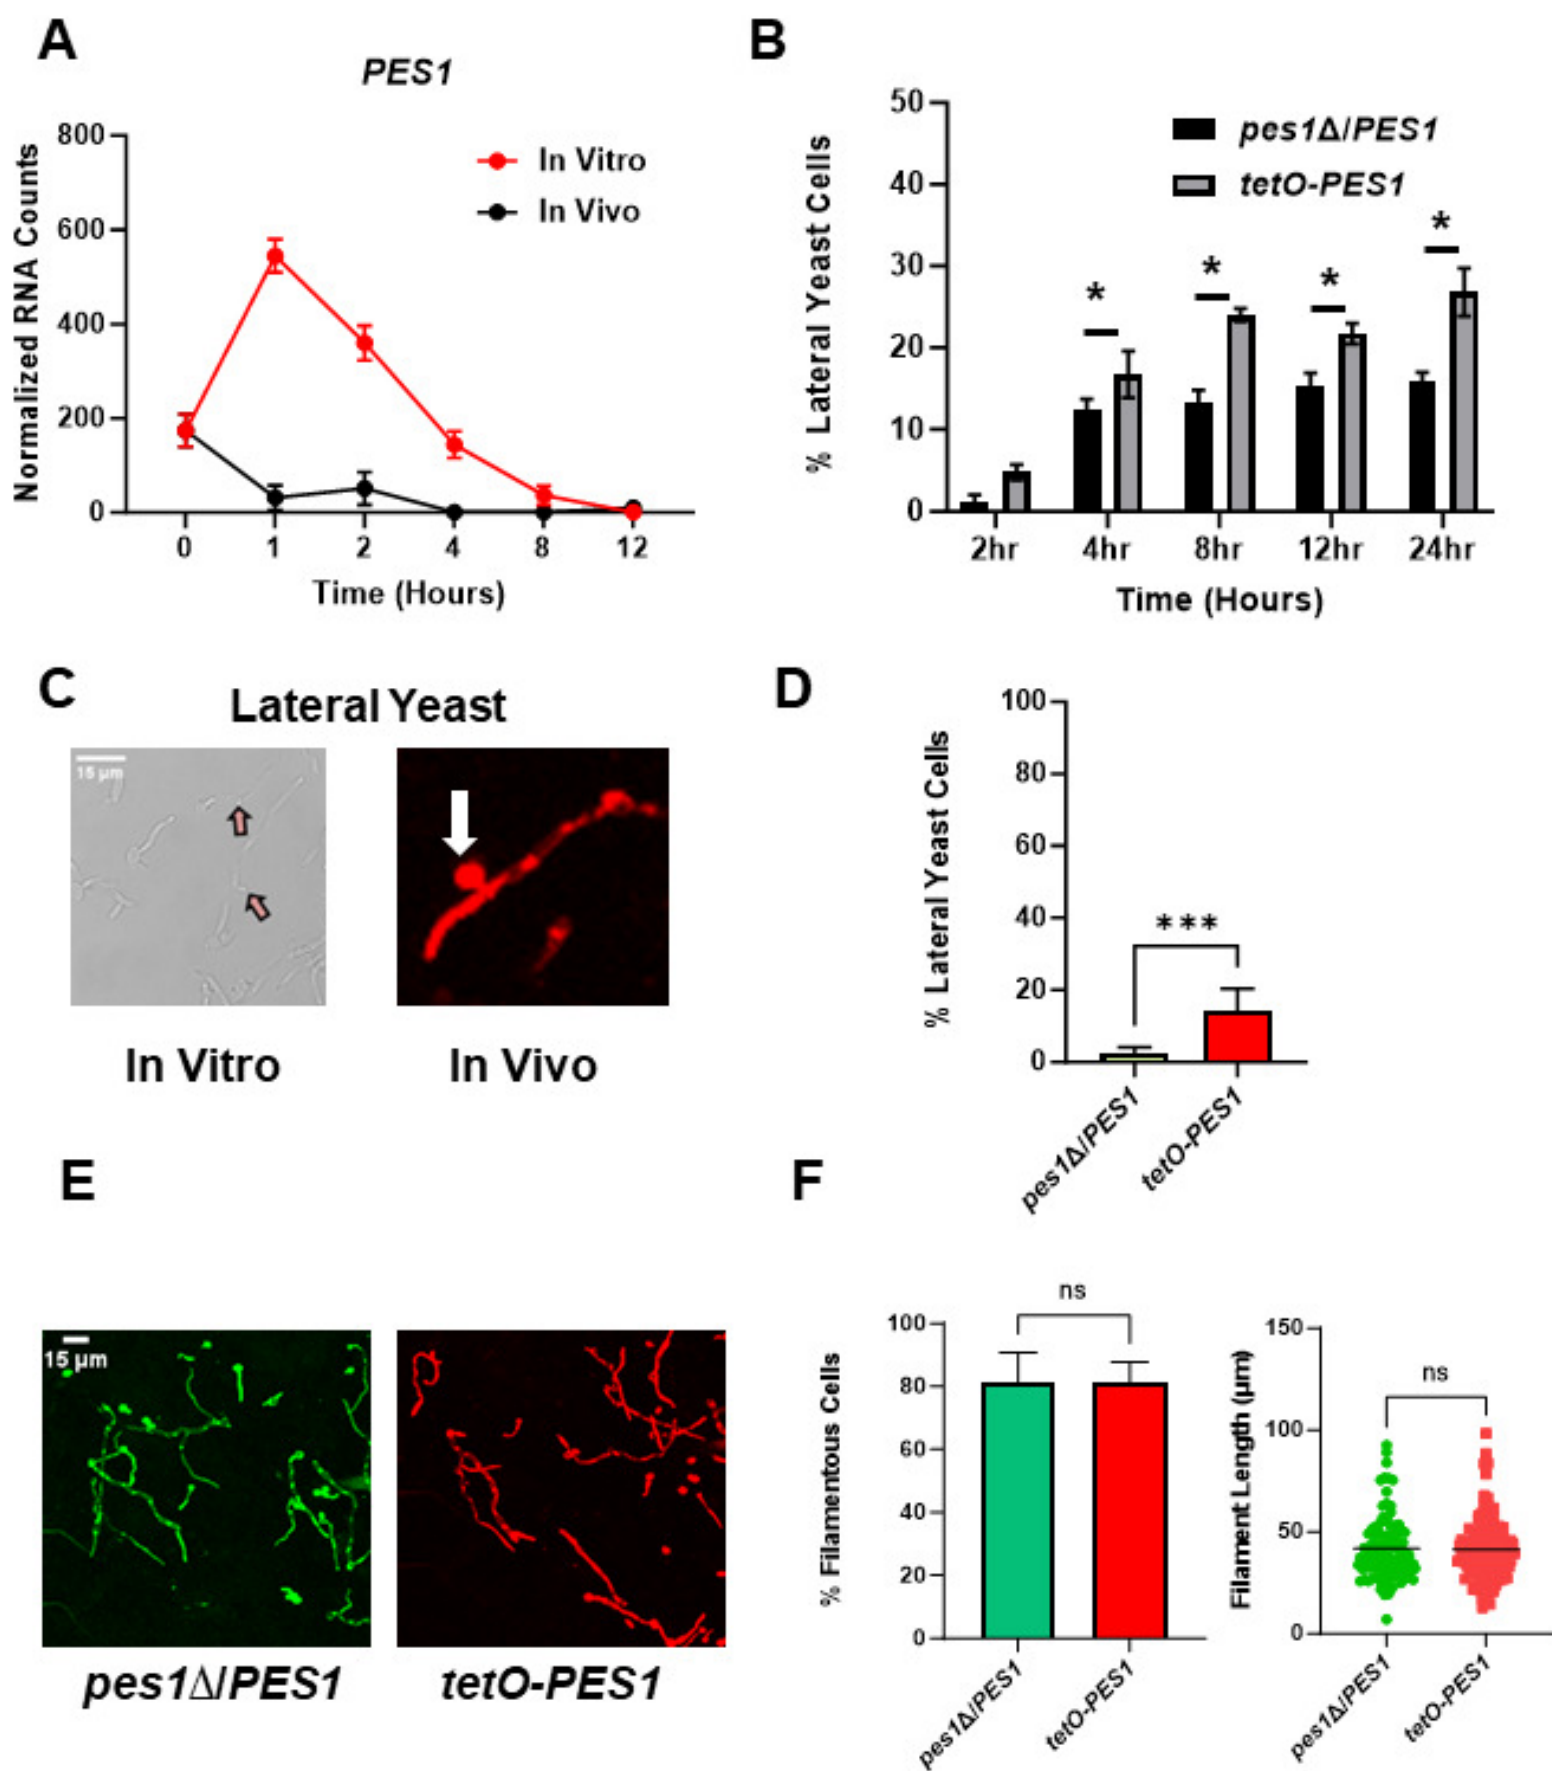

Source: https://www.biorxiv.org/content/biorxiv/early/2024/02/20/2024.02.20.581211.full.pdf
